# Supplementary material for: Chemical Compositions and Mosquito Larvicidal Activities of Essential Oils from Piper Species Growing Wild in Central Vietnam
Source: PubMed Central journal article supplement (PMC6864731; doi:10.3390/molecules24213871), 2019-10-27
Supplement: molecules-24-03871-s001.pdf [file molecules-24-03871-s001.pdf]

# Chemical Compositions and Mosquito Larvicidal Activities of Essential Oils from *Piper* Species Growing Wild in Central Vietnam

Lê Thị Hương<sup>1</sup>, Nguyễn Huy Hùng<sup>2,\*</sup>, Đỗ Ngọc Đài<sup>3</sup>, Thiều Anh Tài<sup>4</sup>, Vũ Thị Hiền<sup>5</sup>, Prabodh Satyal<sup>6</sup>, and William N. Setzer<sup>6,7,\*</sup>

## Supplementary Material

Total Ion Chromatograms of Essential Oils of *Piper* Species from Central Vietnam.

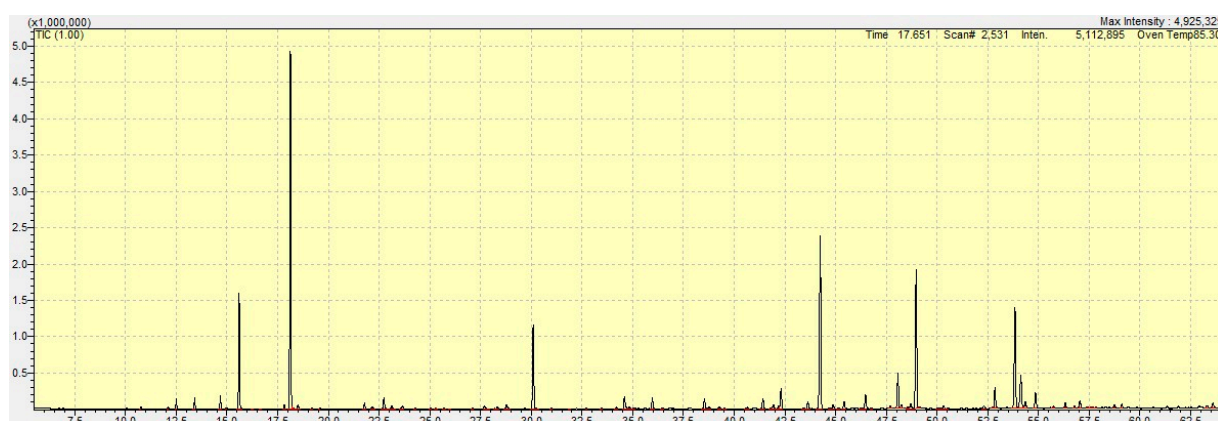

Figure S1. Total ion chromatogram of *Piper arboricola* leaves and stems essential oil.

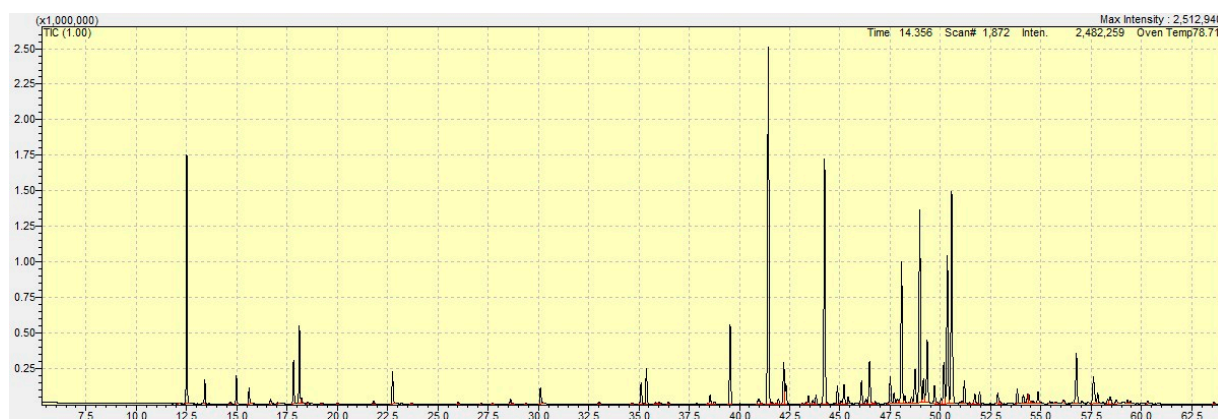

Figure S2. Total ion chromatogram of *Piper arboricola* leaf essential oil.

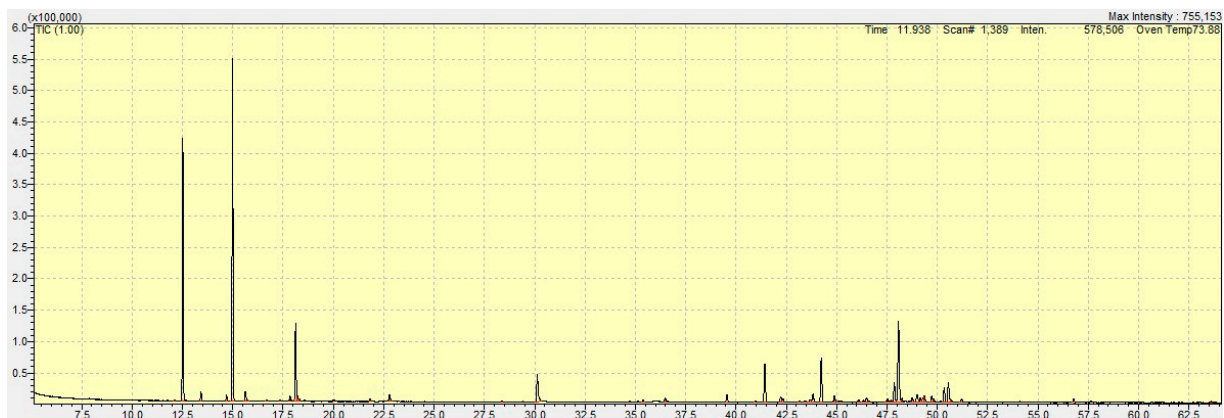

**Figure S3.** Total ion chromatogram of *Piper arboricola* stem essential oil.

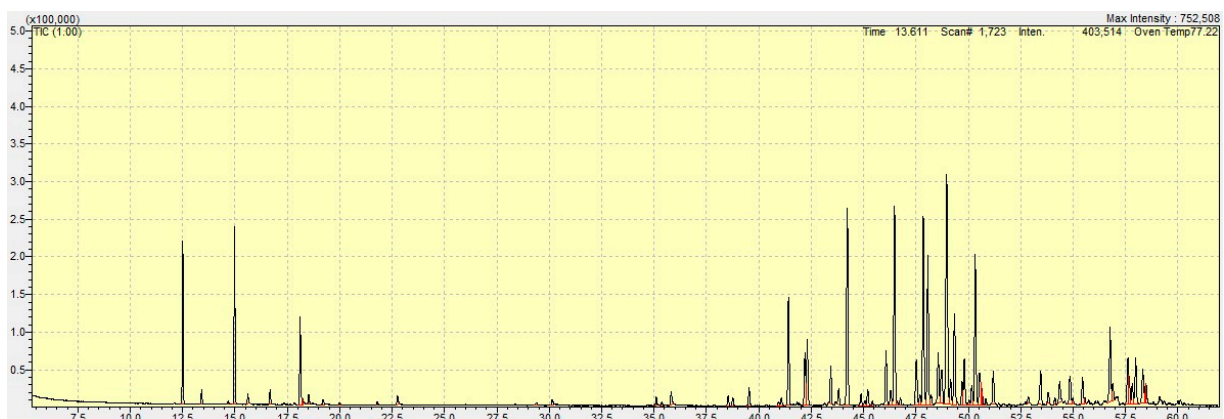

**Figure S4.** Total ion chromatogram of *Piper bavinum* leaves and stems essential oil.

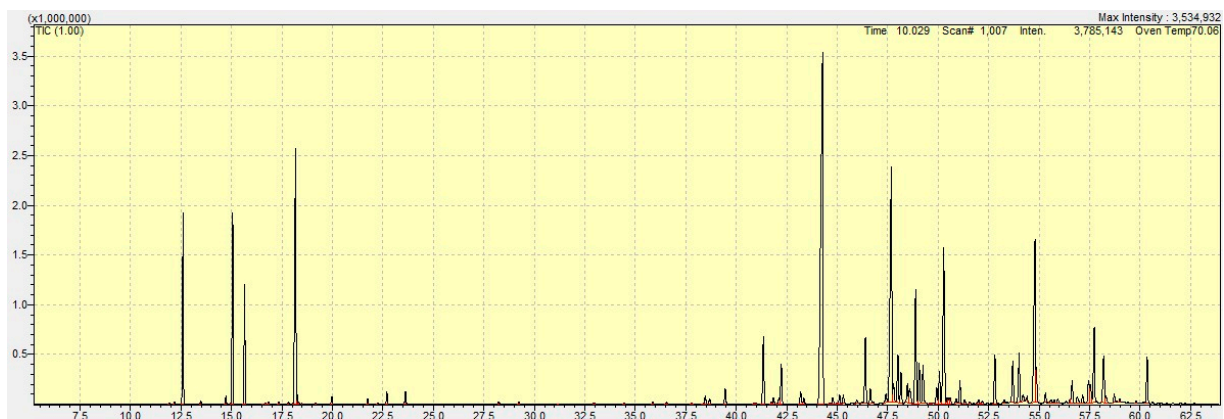

**Figure S5.** Total ion chromatogram of *Piper cambodianum* leaves and stems essential oil.

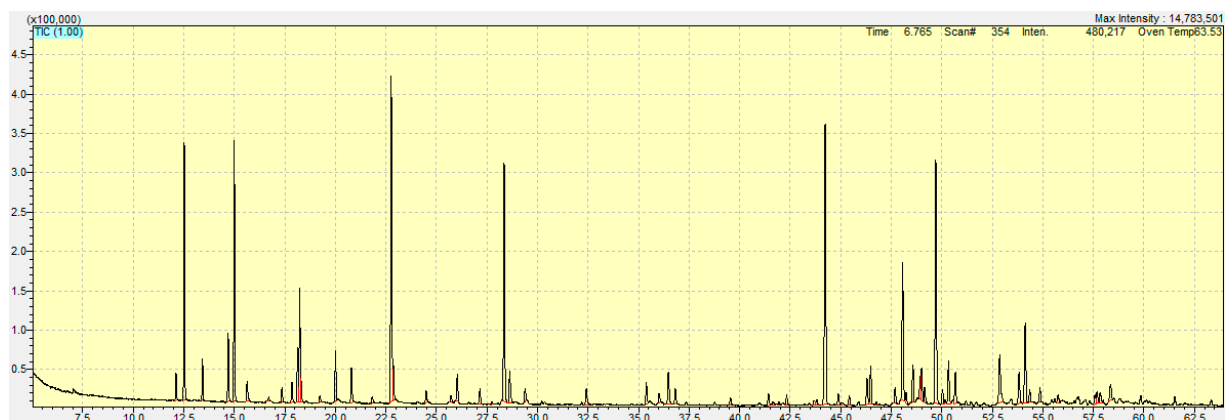

**Figure S6.** Total ion chromatogram of *Piper caninum* leaves and stems essential oil.

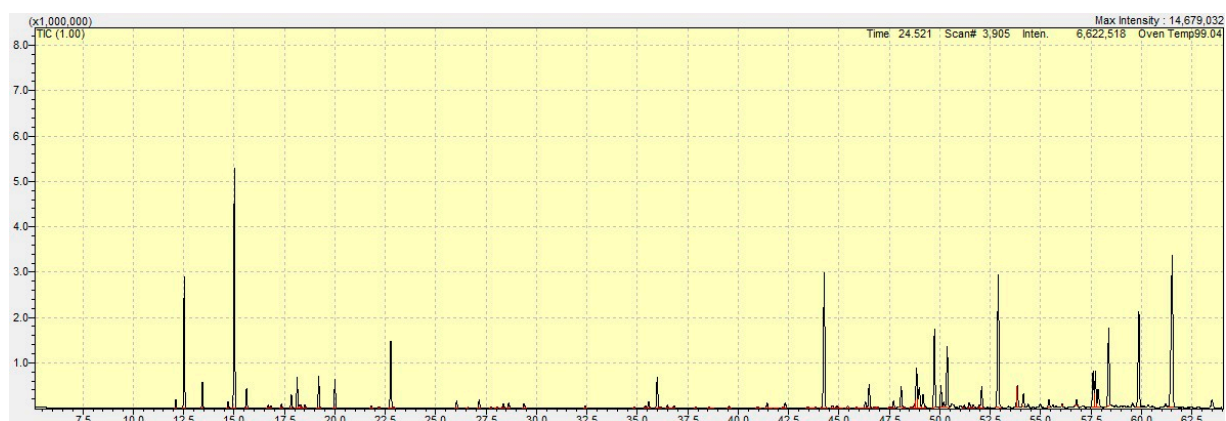

**Figure S7.** Total ion chromatogram of *Piper longum* leaves and stems essential oil.

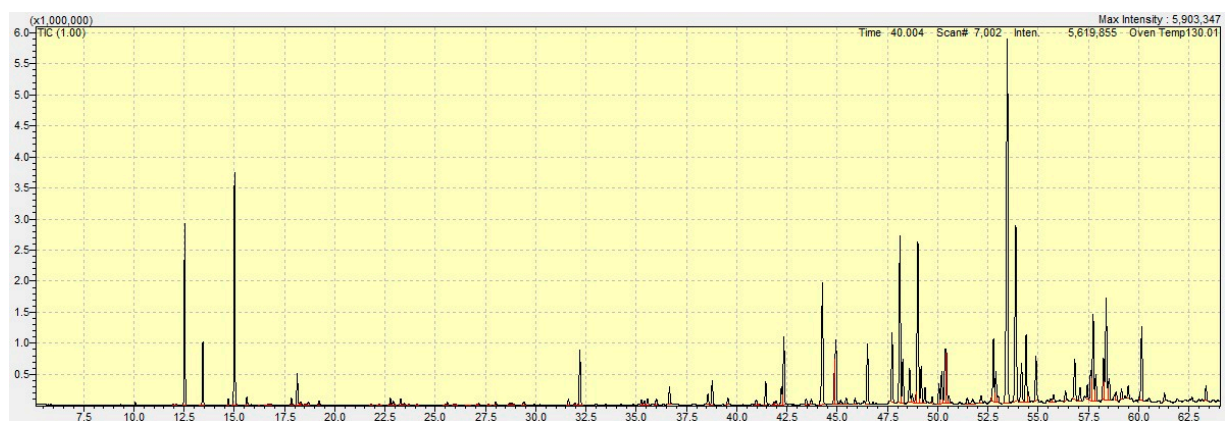

**Figure S8.** Total ion chromatogram of *Piper mekongense* leaves and stems essential oil.

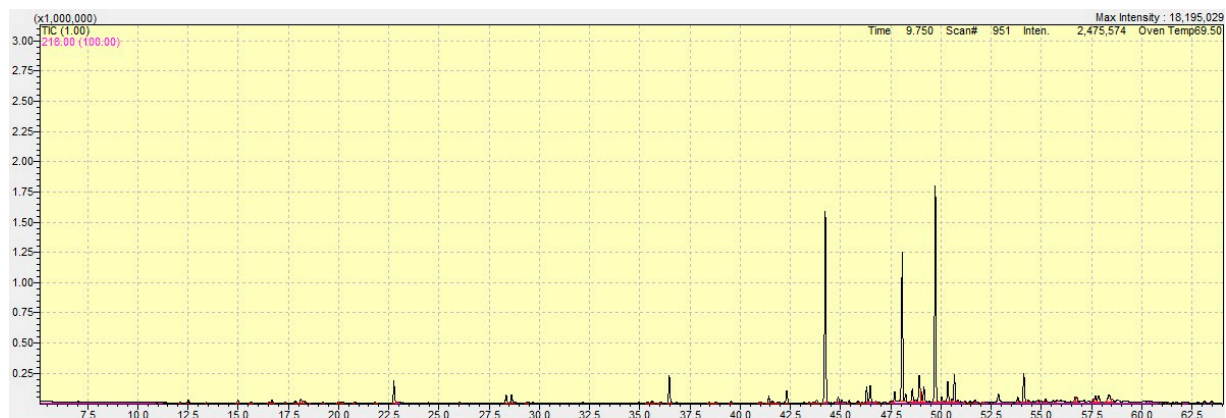

**Figure S9.** Total ion chromatogram of *Piper montium* leaves and stems essential oil.

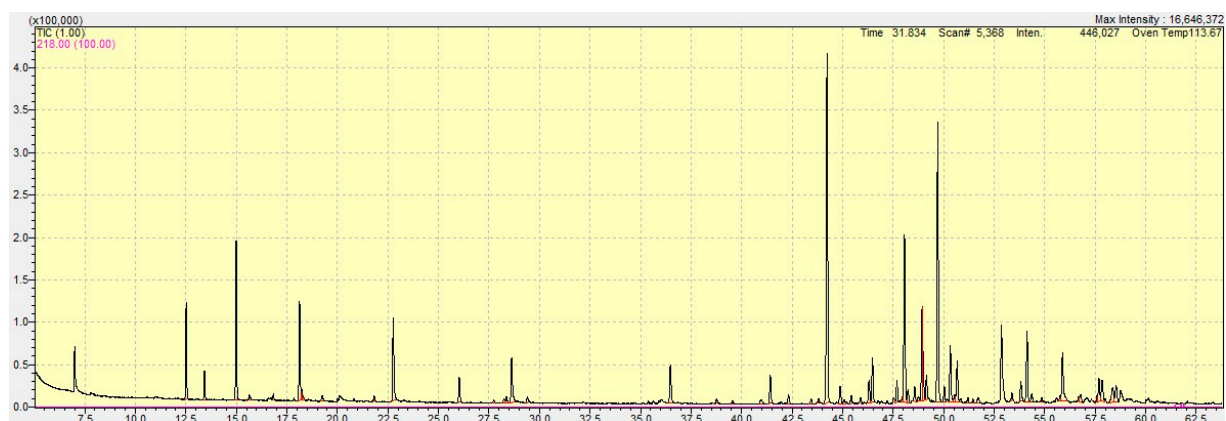

**Figure S10.** Total ion chromatogram of *Piper mutabile* leaves and stems essential oil.

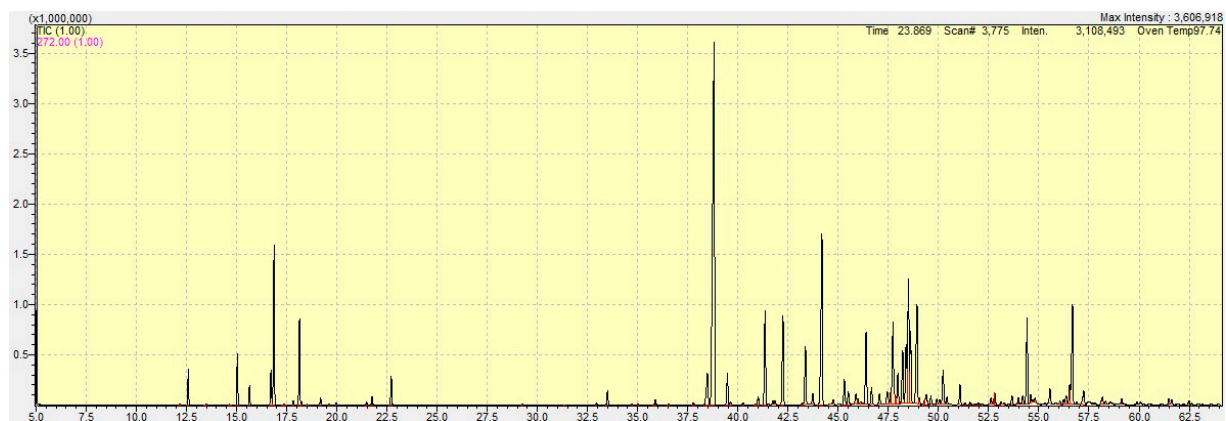

**Figure S11.** Total ion chromatogram of *Piper nigrum* leaves and stems essential oil.

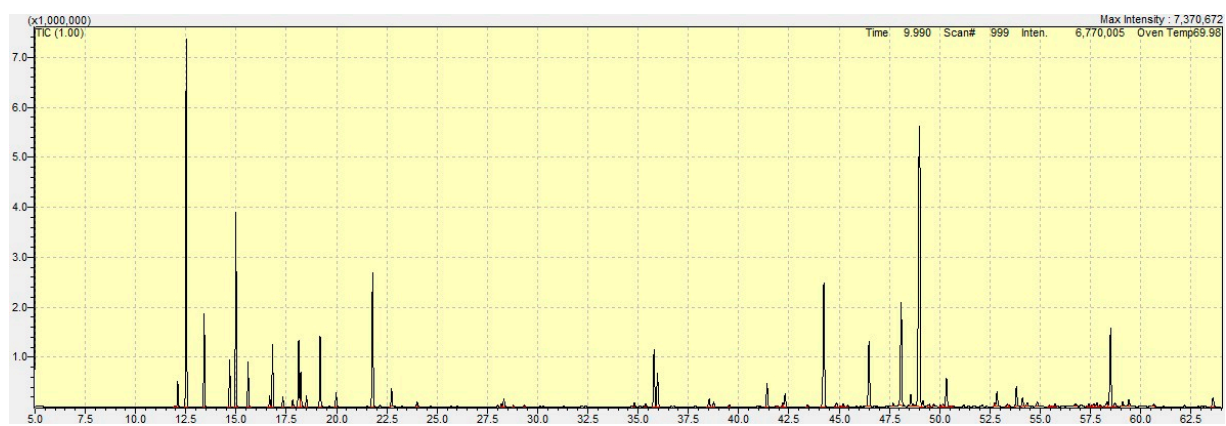

Figure S12. Total ion chromatogram of *Piper politifolium* leaves and stems essential oil.

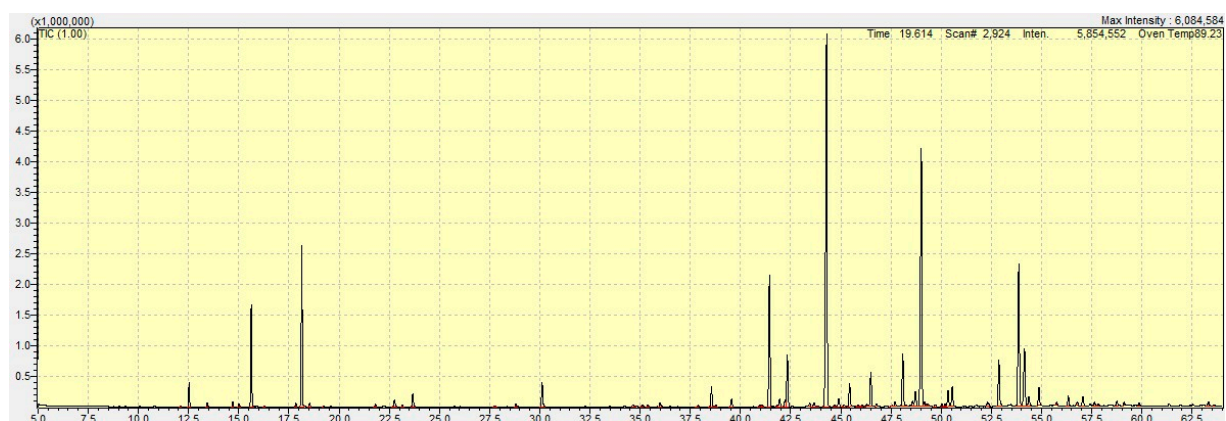

Figure S13. Total ion chromatogram of *Piper rubrum* leaf essential oil.

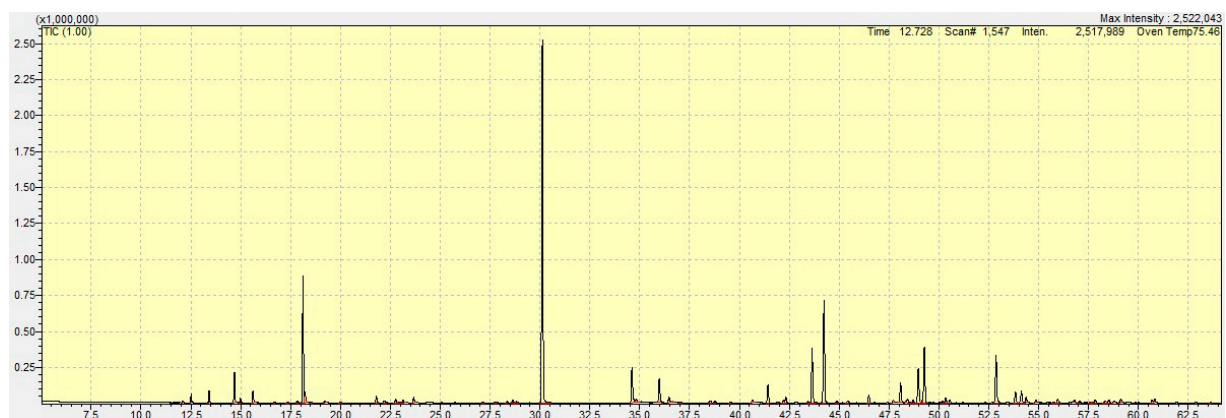

Figure S14. Total ion chromatogram of *Piper rubrum* stem essential oil.

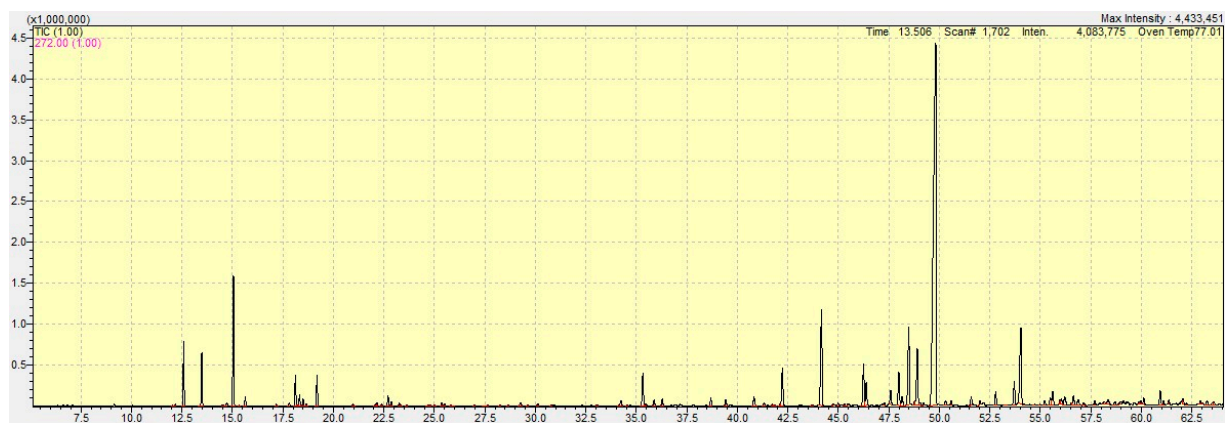

Figure S15. Total ion chromatogram of *Piper sarmentosum* leaves and stems essential oil.

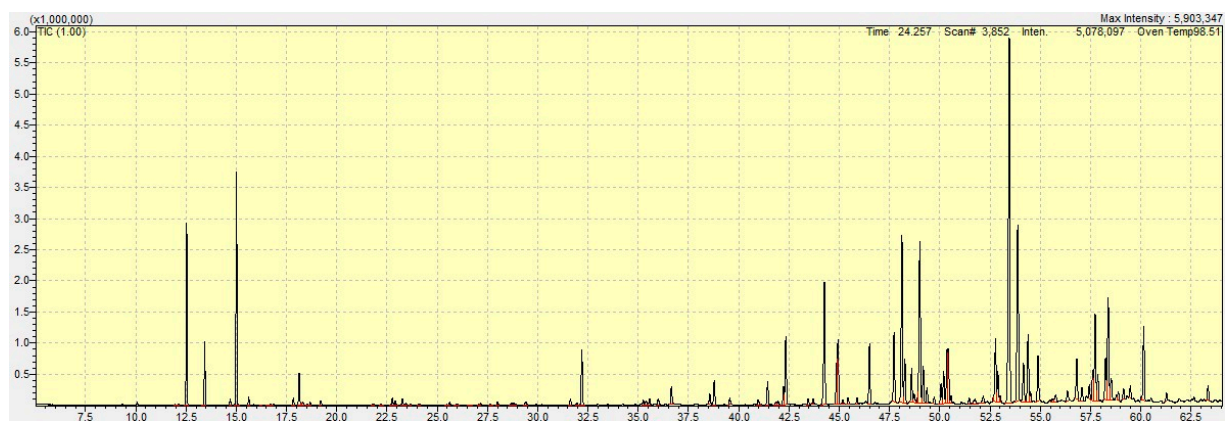

Figure S16. Total ion chromatogram of *Piper umbellatum* leaves and stems essential oil.
